Anesthesiology  
 1998; 88:429-39  
 © 1998 American Society of Anesthesiologists, Inc.  
 Lippincott-Raven Publishers

## In Vivo Effects of Dexmedetomidine on Laser-Doppler Flow and Pial Arteriolar Diameter

Pragati Ganjoo, M.B.B.S., D.A., D.N.B.,\* Neil E. Farber, M.D., Ph.D.,† Antal Hudetz, B.M.D., Ph.D.,‡  
 Jeremy J. Smith, M.B., F.F.A.R.C.S.I.,§ Enric Samsó, M.D.,§ John P. Kampine, M.D., Ph.D.,||  
 William T. Schmeling, M.D., Ph.D.#

**Background:** The  $\alpha_2$ -adrenergic agonist dexmedetomidine alters global cerebral blood flow (CBF). However, few studies have investigated the action of dexmedetomidine on the cerebral microcirculation. This investigation examined the effects of dexmedetomidine on (1) regional CBF in the rat cerebral cortex using laser-Doppler flowmetry and (2) on pial arteriolar diameter.

**Methods:** Halothane-anesthetized rats were fitted with instruments to measure CBF as determined by laser-Doppler flow ( $CBF_{ldf}$ ) or to measure pial arteriolar diameter by preparing a cranial hollow deepened until a translucent plate of skull remained, thereby maintaining the integrity of the cranial vault. In both groups, 20  $\mu\text{g}/\text{kg}$  dexmedetomidine was infused intravenously. Thirty minutes later, the mean arterial pressure was restored to control values with an infusion of phenylephrine (0.5 to 5  $\mu\text{g}/\text{kg}/\text{min}$ ).

**Results:** Administration of dexmedetomidine was associated

with decreases in end-tidal and arterial carbon dioxide. The  $CBF_{ldf}$  and pial arteriolar diameter were measured during normocapnia (controlled carbon dioxide) and during dexmedetomidine-induced hypocapnia. Intravenous administration of dexmedetomidine significantly decreased systemic arterial pressure concurrent with a decrease in  $CBF_{ldf}$  (22% in normocapnic animals, 36% in hypocapnic animals). Restoration of mean arterial pressure increased  $CBF_{ldf}$  in normocapnic but not in hypocapnic animals. Similarly, dexmedetomidine significantly reduced pial vessel diameter in both normocapnic (9%) and hypocapnic animals (17%). However, vessel diameters remained decreased in the normocapnic and hypocapnic animals after the mean arterial pressure was restored.

**Conclusions:** These results suggest a modulation of cerebral vascular autoregulation by dexmedetomidine which may be mediated, in part, by alterations in carbon dioxide. Dexmedetomidine may have a direct action on the cerebral vessels to reduce the CBF during normo- or hypocapnia. The differences between  $CBF_{ldf}$  and pial arteriole responses to restoration of mean arterial pressure may reflect the difference in measurement techniques because laser-Doppler measurements reflect the net effect of several arterial segments on microvascular perfusion, whereas diameter measurements specifically examined individual pial arterioles, suggesting that dexmedetomidine vasoconstriction in the cerebral vasculature may be differentially and regionally mediated. (Key words:  $\alpha_2$ -adrenergic agonists; brain; cerebral blood flow; microcirculation; microcopy.)

DEXMEDETOMIDINE, a highly selective  $\alpha_2$ -adrenergic agonist, possesses potentially useful perianesthetic properties, including sedation, analgesia, anxiolysis, muscle relaxation, hemodynamic stability, and a reduction in the mean alveolar concentration of inhalational anesthetics,<sup>1-6</sup> all mediated through specific presynaptic and postsynaptic  $\alpha_2$ -adrenergic receptors within the central nervous system.<sup>1-3,5-7</sup> Other  $\alpha_2$ -adrenergic agonists decrease the cerebral blood flow (CBF) in humans and animals.<sup>8-10</sup> Studies suggest that dexmedetomidine may produce significant reductions in CBF without specifically influencing the cerebral metabolic rate for oxygen.<sup>11-13</sup> Dexmedetomidine-induced reductions in CBF have also been observed in the presence of changes in

\* Research Fellow in Anesthesiology.

† Assistant Professor of Anesthesiology and Pediatrics, Pharmacology and Toxicology, and Director, Pediatric Anesthesia Research.

‡ Research Associate Professor of Physiology and Anesthesiology.

§ Visiting Professor in Anesthesiology.

|| Professor and Chairman of Anesthesiology, and Professor of Physiology.

# Professor of Anesthesiology, Pharmacology and Toxicology; Chief, Anesthesiology and Critical Care Service; and Program Director, Special Care, Zablocki Veterans Affairs Medical Center.

Received from the Departments of Anesthesiology, Pharmacology and Toxicology, and Physiology, The Medical College of Wisconsin, and the Zablocki Veterans Affairs Medical Center, Milwaukee, Wisconsin. Submitted for publication October 18, 1996. Accepted for publication October 3, 1997. Supported in part by National Institutes of Health Anesthesiology Research Training grants GM 36144 and 08377, a FAER/Ohmeda/Society for Pediatric Anesthesia award (to Dr. Farber), and Medical Research Funds from the Department of Veterans Affairs. Presented in part at the annual meeting of the American Society of Anesthesiology, San Francisco, California, October 15-19, 1994.

Address reprint requests to Dr. Schmeling: Department of Anesthesiology, Medical College of Wisconsin, 8701 Watertown Plank Road, Milwaukee, Wisconsin 53226. Address electronic mail to: willie@mcw.edu

the pressures of arterial carbon dioxide and oxygen.<sup>14,15</sup> Most previous studies have examined the action of dexmedetomidine on global CBF. Studies have suggested that certain volatile anesthetics may differentially effect global and regional CBF.<sup>16</sup> Thus it may be critically important to distinguish between specific regional erythrocyte flow and global CBF.

Laser-Doppler flowmetry (CBF<sub>ldf</sub>) measures CBF to highly localized regions of the brain,<sup>17-19</sup> in a minimally invasive manner, and continuously monitors microvascular perfusion of tissues. Pial arteriolar diameter changes also may be valid indicators of local cerebral perfusion responses.<sup>20,21</sup>

Previous *in vitro* studies from this laboratory<sup>22</sup> showed that dexmedetomidine vasoconstricted canine middle cerebral artery vessels. In addition, recent *in vivo* canine studies showed a significant dexmedetomidine-induced constriction of pial vessels.<sup>23</sup> However, studies have not fully compared the effects of dexmedetomidine on regional CBF, autoregulation, and vessel diameter in the cerebral microcirculation. The purpose of the present investigation was to identify the specific actions of dexmedetomidine on (1) autoregulation of regional CBF in the rat cerebral cortex using laser-Doppler flowmetry and on (2) pial arteriolar diameter by direct microscopic observation through a thinned cranium. These studies were performed during alterations in systemic arterial pressure (SAP) and also during normocapnia and dexmedetomidine-induced hypocapnia. We hypothesized that dexmedetomidine would similarly alter pial vessel diameter and CBF<sub>ldf</sub> in anesthetized rats.

## Materials and Methods

### *Animal Preparation*

All studies were approved by the Animal Use and Care Committee of the Medical College of Wisconsin and were in accordance with National Institutes of Health guidelines (*Guide for the Care and Use of Laboratory Animals*, DHEW [DHHS], NIH publication no. 85-23, revised 1985).

Anesthesia was induced in 33 adult, male Sprague-Dawley rats (weighing 250–450 g) by an intraperitoneal injection of pentobarbital (65 mg/kg; Sigma Chemical Co., St. Louis, MO). After a midline ventral neck dissection, the trachea was isolated and cannulated with polyethylene tubing (PE 240, Intramedic®, Becton Dickinson,

Parsippany, NJ). The femoral artery and vein were cannulated with polyethylene catheters (PE 50, Intramedic®) filled with heparinized saline to transduce SAP, maintain fluids, and administer drugs, respectively. Intermittent positive-pressure ventilation with 70% nitrogen and 30% oxygen was instituted (model 707; Harvard Apparatus, South Natick, MA). The inspired gases were mixed using a calibrated 3-tube flowmeter (Linde; Union Carbide, Somerset, NJ). Anesthesia was maintained with 1 mean alveolar concentration halothane. Gallamine (80 mg/kg given intraperitoneally; Sigma Chemical) was used to maintain muscle paralysis. Inspired and expired oxygen, carbon dioxide, and volatile anesthetic concentrations were measured continuously (POET II; TM Criticare Systems, Milwaukee, WI). Arterial blood gas tensions were intermittently determined using a blood gas analyzer (Radiometer ABL3; Copenhagen, Denmark). Body temperature was continuously monitored using a rectal thermistor and maintained at  $37 \pm 0.2^\circ\text{C}$  with a water-circulated heating pad (model 73 ATA; YSI, Yellow Springs, OH). Cranial/pericranial temperature was not monitored, but the cranial vault remained intact without breaching the transcranial bone or the dura in all experiments. End-tidal carbon dioxide (FET<sub>CO<sub>2</sub></sub>), mean systemic arterial blood pressure (MAP), systolic SAP, diastolic SAP, cerebral blood flow (CBF<sub>ldf</sub>), and the concentration of anesthetic vapor were displayed continuously and recorded on an eight-channel polygraph (Astro-Med, West Warwick, RI).

The rats were positioned prone and their heads secured in a stereotaxic apparatus (model 900; David Kopf, Tujunga, CA). After removal of a 2-cm<sup>2</sup> area of scalp and connective tissue, a cranial hollow, 2 mm in diameter, was drilled over the right parietal cerebral cortex, approximately 3 mm posterior to the bregma and 3 mm to the right of the midline. The drilling was done with the aid of a stereomicroscope (Stereo Zoom 5; Cambridge Instruments, Division of Leica, Inc., Deerfield, IL) using a low-speed (0–8,000 rpm) air drill (model Rhino XP; Midwest Dental, Des Plaines, IL), and the surface was simultaneously cooled by continuous air flow through a suction tip. The cranial hollow was deepened until a translucent plate of skull remained, as described previously by Hudetz *et al.*<sup>18</sup>

### *Measurement of Cerebral Blood Flow by Laser-Doppler Flow (Groups I<sub>A</sub> and I<sub>B</sub>)*

In 18 rats, microvascular perfusion was monitored throughout the study using a laser-Doppler flowmeter

(PF3; Perimed, Stockholm, Sweden) and flowprobe (PF 316 dental probe; Perimed) with a tip diameter of 1 mm. Using a micromanipulator, the probe was lowered and positioned within the burr hole. Mineral oil was applied to improve optical coupling between the probe tip and brain tissue. Care was taken to avoid positioning the probe over large, visible vessels, which were also easily identified by extraordinarily high flow values. Once established, the probe position was not altered for the duration of the experimental protocol.

All animals were allowed to stabilize for 1 h during 1 mean alveolar concentration halothane administration and normocapnia ( $FET_{CO_2}$ , 34–37 mmHg). After baseline control measurements of  $CBF_{LDF}$ , MAP, SAP, diastolic SAP, and  $FET_{CO_2}$ , dexmedetomidine (20  $\mu\text{g}/\text{kg}$ ; Farnos Group, Turku, Finland), dissolved in 1 ml normal saline, was infused intravenously during a 15-min period. Subsequently, a 15-min period was allowed for equilibration after dexmedetomidine infusion and measurements were repeated. The MAP was restored to control values in the next 20–25 min using a titrated infusion of phenylephrine (0.5–5  $\mu\text{g} \cdot \text{kg}^{-1} \cdot \text{min}^{-1}$ ; Sigma Chemical Co., St. Louis, MO), and all parameters were again measured at 50% and 100% restoration of MAP. Experiments were successfully completed in 12 rats (groups I<sub>A</sub> and I<sub>B</sub>). Preliminary experiments suggested that during dexmedetomidine infusion there was a decrease in the  $FET_{CO_2}$  values. Consequently, in eight animals, the ventilation was continuously adjusted to maintain normocapnia (group I<sub>A</sub>,  $n = 8$ ), whereas in four animals, no adjustments in ventilation were made, and thus the  $FET_{CO_2}$  was allowed to vary (group I<sub>B</sub>,  $n = 4$ ).

#### *Measurement of Pial Arteriolar Diameter (Groups II<sub>A</sub> and II<sub>B</sub>)*

Fifteen rats were used to examine the effects of dexmedetomidine on the cerebral microvasculature by direct microscopic observation through a thinned cranium. A cranial burr hole was made to a maximum depth but without completely penetrating the skull. The cranial hollow was cleaned and dried by vacuum, filled with a drop of mineral oil, and sealed with a quartz cover slip (Fisher Scientific, Pittsburgh, PA). Pial arteries were visualized using a dark-field metallurgical microscope (model BHMJ; Olympus, Tokyo, Japan) equipped with a 50-W halogen lamp and a vertical epi-illuminator. The incident light was filtered using an infrared filter to minimize heating of the tissue. A 20 $\times$  ultralong working

distance, infinity-corrected lens (ULWD Neo SPlan 20, 0.40; Olympus) was used with a 2.5 $\times$  TV projection lens. Pial arteries were differentiated from pial veins by lighter color, differences in the branching pattern, and the presence of pulsatile flow. The microscopic image was monitored using a CCD video camera (model VDC-2524; Sanyo, Osaka, Japan), which was continuously displayed and video recorded (model HR-D780V; JVC, Yokohama, Japan).

The experimental protocol was similar to that used in groups I<sub>A</sub> and I<sub>B</sub>. Briefly, control video recordings of the microvessels were made. Dexmedetomidine was infused and recording of the microvessels was repeated, phenylephrine administered, and recordings again made. Experiments were successfully completed in ten rats (groups II<sub>A</sub> and II<sub>B</sub>). In a manner similar to the  $CBF_{LDF}$  flow experiments of groups I<sub>A</sub> and I<sub>B</sub>, a decrease in  $FET_{CO_2}$  was observed with infusions of dexmedetomidine. Consequently,  $FET_{CO_2}$  was controlled within normocapnic limits in six rats (group II<sub>A</sub>,  $n = 6$ ), whereas in four rats (group II<sub>B</sub>,  $n = 4$ ) ventilation was not adjusted.

Using a JVC professional video recorder (model BR-S525U) the recorded video images were examined, selected at specified intervals, and grabbed using an image capturer board (Spectrum NTSC; Redlake Corp., Morgan Hill, CA). Hard copies of selected video images were made using the video graphics printer (UP-860; Sony Corp., Teaneck, NJ). Vessel diameter was measured for the digitized image contrast-enhanced images using Image I software (National Institutes of Health, Bethesda, MD). In each image, seven to eight lines were drawn perpendicular to the length of the vessel and across its opposite edges, and these distances were averaged and calibrated to give an average vessel diameter.

#### *Dexmedetomidine, End-tidal Gas, and Arterial Gas Tensions (Group III)*

To confirm that changes in expired end-tidal gas concentrations reflected systemic arterial gas tensions, seven additional adult, male Sprague-Dawley rats (group III) were prepared in a manner similar to that of groups I and II. The animals were anesthetized, ventilated, fitted with monitoring instruments, and positioned in an identical manner. The scalp was not incised and burr holes were not made. The experimental protocol was identical to that of groups I<sub>B</sub> and II<sub>B</sub>. A 0.25 to 0.5 ml sample of arterial blood was analyzed for pH and partial pressures of carbon dioxide and oxygen during control conditions, at the conclusion of dexmedetomidine infusion

**Table 1. Effects of Dexmedetomidine during Normocapnia (Group I<sub>A</sub>, N = 8)**

|                                      | Control     | Dexmedetomidine Infusion |             |             | Post Dexmedetomidine |             |             | Phenylephrine Infusion |             |
|--------------------------------------|-------------|--------------------------|-------------|-------------|----------------------|-------------|-------------|------------------------|-------------|
|                                      |             | 5 min                    | 10 min      | 15 min      | 20 min               | 25 min      | 30 min      | 50%                    | 100%        |
| SAP (mmHg)                           | 143 ± 3     | 142 ± 8                  | 127 ± 10*   | 119 ± 7*    | 105 ± 7*             | 101 ± 7*    | 102 ± 7*    | 122 ± 6*               | 144 ± 4     |
| DAP (mmHg)                           | 82 ± 3      | 87 ± 8                   | 77 ± 8      | 75 ± 7      | 64 ± 7*              | 59 ± 8*     | 57 ± 5*     | 70 ± 4                 | 79 ± 4      |
| MAP (mmHg)                           | 102 ± 3     | 105 ± 7                  | 93 ± 8      | 88 ± 7*     | 75 ± 6*              | 70 ± 6*     | 69 ± 6*     | 87 ± 4*                | 102 ± 4     |
| FET <sub>CO<sub>2</sub></sub> (mmHg) | 35 ± 0      | 35 ± 0†                  | 35 ± 0†     | 35 ± 0†     | 35 ± 0†              | 35 ± 0†     | 35 ± 0†     | 35 ± 0†                | 35 ± 0†     |
| RESIS (mmHg/<br>perfusion units)     | 0.66 ± 0.02 | 0.75 ± 0.04              | 0.72 ± 0.06 | 0.74 ± 0.08 | 0.65 ± 0.08          | 0.62 ± 0.09 | 0.60 ± 0.06 | 0.70 ± 0.06            | 0.68 ± 0.05 |

SAP = systolic arterial pressure; DAP = diastolic arterial pressure; MAP = mean arterial pressure; FET<sub>CO<sub>2</sub></sub> = end-tidal carbon dioxide concentrations; RESIS = derived cerebrovascular resistance (MAP/CBF<sub>ldf</sub>) (see fig. 1); 50%, 100% restoration of MAP by phenylephrine infusion by 50% or 100%.

\* Significantly different ( $P < 0.05$ ) from control.

† Significantly different ( $P < 0.05$ ) from group I<sub>B</sub> (hypocapnia).

(15 min), 15 min after completion of dexmedetomidine infusion (30 min), and after restoration (100%) of SAP with phenylephrine.

#### Statistical Analysis

All data are expressed as means ± SEM. All CBF<sub>ldf</sub> values were normalized to percentages of control. Statistical analysis of data within and between groups during control conditions and during dexmedetomidine infusion, after infusion, and during phenylephrine administration was performed with a repeated measures analysis of variance and Duncan's modification of the *t* test, using the SAS procedure GLM software (SAS Institute, Cary, NC). Changes from control values were considered significant when the probability value was <0.05.

## Results

#### Dexmedetomidine and Laser-Doppler Flow Determination of Cerebral Blood Flow

During control conditions with 1 mean alveolar concentration halothane equilibration and normocapnia, baseline MAP was 102 ± 3 mmHg and CBF<sub>ldf</sub> was 156 ± 6 perfusion units in group I<sub>A</sub> (normocapnia) (table 1, fig. 1). Values were similar in group I<sub>B</sub> (hypocapnia) with MAP and CBF<sub>ldf</sub> of 109 ± 3 mmHg and 163 ± 10 perfusion units, respectively (table 2, fig. 1). Subsequent to initiating the dexmedetomidine infusion, a transient, nonsignificant increase in MAP was observed in most animals. This was followed by a progressive and significant decrease in MAP in animals in groups I<sub>A</sub> and I<sub>B</sub>. Thirty minutes after initiating dexmedetomidine infu-

sion, MAP decreased by 32% in group I<sub>A</sub> rats (102 ± 3 to 69 ± 6 mmHg) and by 36% in group I<sub>B</sub> rats (109 ± 3 to 70 ± 2 mmHg). During the dexmedetomidine infusion, a significant reduction in FET<sub>CO<sub>2</sub></sub> was observed in group I<sub>B</sub> rats (30 ± 2 mmHg 30 min after dexmedetomidine infusion compared with 35 ± 0 in control), whereas in group I<sub>A</sub> the ventilation was adjusted to keep the FET<sub>CO<sub>2</sub></sub> within normocapnic limits.

After starting the infusion of dexmedetomidine, sig-

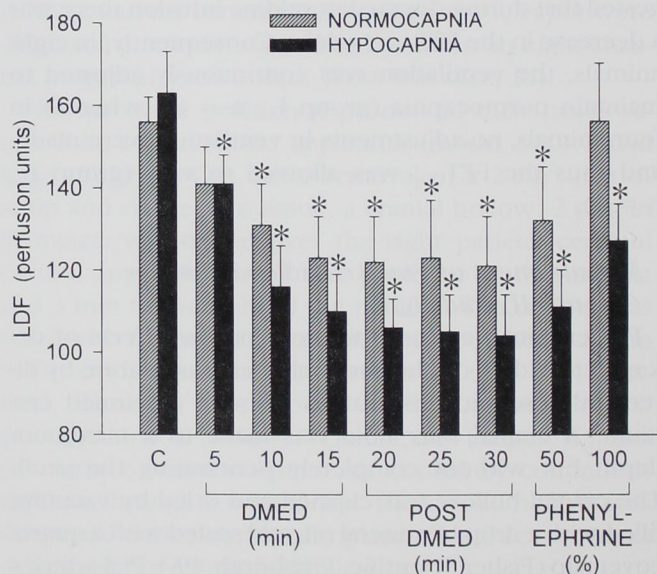

**Fig. 1. The effect of dexmedetomidine (20 µg/kg) on laser-Doppler flow during normocapnia and hypocapnia and after restoration of systemic arterial pressure with phenylephrine. % refers to 50% or 100% restoration of control mean arterial pressure. \*Significantly different ( $P < 0.05$ ) compared with control values.**

## DEXMETETOMIDINE AND CEREBROVASCULAR CIRCULATION

**Table 2. Effects of Dexmedetomidine during Hypocapnia (Group I<sub>B</sub>, N = 4)**

|                                      | Dexmedetomidine Infusion |             |              |              | Post Dexmedetomidine |             |             | Phenylephrine Infusion |              |
|--------------------------------------|--------------------------|-------------|--------------|--------------|----------------------|-------------|-------------|------------------------|--------------|
|                                      | Control                  | 5 min       | 10 min       | 15 min       | 20 min               | 25 min      | 30 min      | 50%                    | 100%         |
| SAP (mmHg)                           | 144 ± 7                  | 142 ± 7     | 134 ± 7      | 124 ± 8*     | 102 ± 11*            | 92 ± 2*     | 91 ± 1*     | 114 ± 10               | 142 ± 5      |
| DAP (mmHg)                           | 87 ± 3                   | 98 ± 7      | 93 ± 7       | 82 ± 8       | 64 ± 8*              | 59 ± 3*     | 58 ± 3*     | 73 ± 3                 | 92 ± 4       |
| MAP (mmHg)                           | 109 ± 3                  | 114 ± 7     | 110 ± 6      | 99 ± 7       | 80 ± 10*             | 71 ± 2*     | 70 ± 2*     | 88 ± 6                 | 111 ± 3      |
| FET <sub>CO<sub>2</sub></sub> (mmHg) | 35 ± 0                   | 33 ± 1*†    | 32 ± 1*†     | 30 ± 1*†     | 30 ± 1*†             | 29 ± 2*†    | 30 ± 2*†    | 31 ± 3*†               | 31 ± 3*†     |
| RESIS (mmHg/perfusion units)         | 0.68 ± 0.06              | 0.80 ± 0.03 | 0.95 ± 0.07* | 0.90 ± 0.04* | 0.75 ± 0.08          | 0.69 ± 0.06 | 0.68 ± 0.05 | 0.80 ± 0.07            | 0.88 ± 0.07* |

SAP = systolic arterial pressure; DAP = diastolic arterial pressure; MAP = mean arterial pressure; FET<sub>CO<sub>2</sub></sub> = end-tidal carbon dioxide concentrations; RESIS = derived cerebrovascular resistance (MAP/CBF<sub>idf</sub>) (see fig. 1); 50%, 100% restoration of MAP by phenylephrine infusion by 50% or 100%.

\* Significantly different ( $P < 0.05$ ) from control.

† Significantly different ( $P < 0.05$ ) from group I<sub>A</sub> (normocapnia).

nificant decreases in CBF<sub>idf</sub> values were observed in group I<sub>A</sub> and I<sub>B</sub> animals. The decreases were not significantly different among the normocapnic groups and hypocapnic groups. Thirty minutes after dexmedetomidine infusion, the decrease in CBF<sub>idf</sub> was 22% in group I<sub>A</sub> rats (156 ± 6 to 121 ± 12 perfusion units) and 36% in group I<sub>B</sub> rats (163 ± 10 to 104 ± 10 perfusion units). When MAP was restored with phenylephrine infusion, the CBF<sub>idf</sub> returned to control values in group I<sub>A</sub> rats (normocapnic; 156 ± 14 perfusion units compared with 156 ± 6 at control) but remained significantly decreased in group I<sub>B</sub> rats (hypocapnic; 127 ± 9 perfusion units compared with 163 ± 10 at control).

#### Dexmedetomidine and Pial Artery Diameter

The MAP at control was 105 mmHg in normocapnic animals (group II<sub>A</sub>) and hypocapnic animals (group II<sub>B</sub>; tables 3 and 4, respectively). Baseline vessel diameter

was 59 ± 4 μm in group II<sub>A</sub> animals, whereas in group II<sub>B</sub> animals the vessel diameter was 72 ± 7 μm. Figure 2 shows the vessel diameters (as percentages of baseline control). There were no differences in vessel diameter (raw or normalized data) between groups during control or at any time during the experimental protocol. Similar to the observation in group I animals, the infusion of dexmedetomidine resulted in a significant decrease in MAP. Thirty minutes after starting dexmedetomidine infusion, the percentage decrease in MAP was 40% in group II<sub>A</sub> (105 ± 1 to 63 ± 6 mmHg) and 40% (105 ± 3 to 63 ± 2 mmHg) in group II<sub>B</sub>. In addition, a significant decrease in FET<sub>CO<sub>2</sub></sub> was observed during dexmedetomidine infusion in the group II<sub>B</sub> rats (30 ± 1 mmHg 30 min after dexmedetomidine infusion compared with 35 ± 0 mmHg at control), whereas the FET<sub>CO<sub>2</sub></sub> was maintained at control levels in the group II<sub>A</sub> animals.

**Table 3. Effects of Dexmedetomidine during Normocapnia (Group II<sub>A</sub>, N = 6)**

|                                      | Dexmedetomidine Infusion |               |             |             | Post Dexmedetomidine |              |              | Phenylephrine Infusion |             |
|--------------------------------------|--------------------------|---------------|-------------|-------------|----------------------|--------------|--------------|------------------------|-------------|
|                                      | Control                  | 5 min         | 10 min      | 15 min      | 20 min               | 25 min       | 30 min       | 50%                    | 100%        |
| SAP (mmHg)                           | 152 ± 3                  | 154 ± 3       | 122 ± 11*   | 119 ± 11*   | 101 ± 13*            | 92 ± 10*     | 88 ± 11*     | 107 ± 10               | 144 ± 4     |
| DAP (mmHg)                           | 88 ± 1                   | 98 ± 6        | 76 ± 10     | 78 ± 10     | 65 ± 10*             | 55 ± 6*      | 52 ± 6*      | 64 ± 6*                | 89 ± 4      |
| MAP (mmHg)                           | 105 ± 1                  | 115 ± 5       | 89 ± 8*     | 87 ± 8*     | 71 ± 8*              | 65 ± 6*      | 63 ± 6*      | 75 ± 5*                | 105 ± 2     |
| FET <sub>CO<sub>2</sub></sub> (mmHg) | 36 ± 0                   | 36 ± 0†       | 35 ± 0†     | 36 ± 0†     | 36 ± 0†              | 36 ± 0†      | 36 ± 0†      | 36 ± 0†                | 36 ± 0†     |
| RESIS (mmHg/μm)                      | 1.87 ± 0.12              | 2.16 ± 0.16*† | 1.72 ± 0.22 | 1.71 ± 0.24 | 1.38 ± 0.24*         | 1.24 ± 0.20* | 1.19 ± 0.20* | 1.48 ± 0.19            | 2.04 ± 0.13 |

SAP = systolic arterial pressure; DAP = diastolic arterial pressure; MAP = mean arterial pressure; FET<sub>CO<sub>2</sub></sub> = end-tidal carbon dioxide concentrations; RESIS = derived cerebrovascular resistance (MAP/DIA) (see fig. 2); 50%, 100% restoration of MAP by phenylephrine infusion by 50% or 100%.

\* Significantly different ( $P < 0.05$ ) from control.

† Significantly different ( $P < 0.05$ ) from group II<sub>B</sub> (hypocapnia).

**Table 4. Effects of Dexmedetomidine during Hypocapnia (Group II<sub>B</sub>, N = 4)**

|                                      | Control     | Dexmedetomidine Infusion |             |             | Post Dexmedetomidine |             |             | Phenylephrine Infusion |              |
|--------------------------------------|-------------|--------------------------|-------------|-------------|----------------------|-------------|-------------|------------------------|--------------|
|                                      |             | 5 min                    | 10 min      | 15 min      | 20 min               | 25 min      | 30 min      | 50%                    | 100%         |
| SAP (mmHg)                           | 134 ± 5     | 139 ± 6                  | 117 ± 9*    | 110 ± 5*    | 86 ± 3*              | 83 ± 3*     | 83 ± 3*     | 112 ± 8*               | 141 ± 3      |
| DAP (mmHg)                           | 87 ± 4      | 87 ± 3                   | 78 ± 7      | 77 ± 6      | 56 ± 2*              | 55 ± 2*     | 55 ± 2*     | 74 ± 5                 | 90 ± 5       |
| MAP (mmHg)                           | 105 ± 3     | 104 ± 2                  | 91 ± 8*     | 88 ± 6*     | 66 ± 1*              | 63 ± 2*     | 63 ± 2*     | 88 ± 6*                | 109 ± 2      |
| FET <sub>CO<sub>2</sub></sub> (mmHg) | 35 ± 0      | 33 ± 1*†                 | 32 ± 1*†    | 31 ± 1*†    | 30 ± 1*†             | 29 ± 1*†    | 30 ± 1*†    | 30 ± 1*†               | 31 ± 2*†     |
| RESIS (mmHg/μm)                      | 1.53 ± 0.13 | 1.61 ± 0.20†             | 1.57 ± 0.29 | 1.65 ± 0.42 | 1.28 ± 0.31          | 1.18 ± 0.34 | 1.21 ± 0.37 | 1.68 ± 0.50            | 2.12 ± 0.55* |

SAP = systolic arterial pressure; DAP = diastolic arterial pressure; MAP = mean arterial pressure; FET<sub>CO<sub>2</sub></sub> = end-tidal carbon dioxide concentrations; RESIS = derived cerebrovascular resistance (MAP/DIA) (see fig. 2); 50%, 100% restoration of MAP by phenylephrine infusion by 50% or 100%.

\* Significantly different ( $P < 0.05$ ) from control.

† Significantly different ( $P < 0.05$ ) from group II<sub>A</sub> (normocapnia).

With dexmedetomidine infusion, a significant decrease in vessel diameter was observed in both group II<sub>A</sub> and II<sub>B</sub> rats. Within 15 min of dexmedetomidine infusion, there was a significant decrease in vessel diameter in both the normocapnic group ( $53 \pm 4$  compared with  $59 \pm 4$ ; 10% of control) and the hypocapnic group ( $61 \pm 10$  compared with  $72 \pm 7$ ; 17% of control; fig. 3). Thirty minutes after dexmedetomidine infusion, the vessel diameter remained significantly decreased by 16% of control in group II<sub>B</sub> rats ( $62 \pm 12$  compared

with  $72 \pm 7 \mu\text{m}$  at control;  $P < 0.05$ ) but not in group II<sub>A</sub> rats ( $56 \pm 5$  compared with  $59 \pm 4 \mu\text{m}$  at control;  $P =$  not significant). When MAP was restored to control values with phenylephrine infusion, the significant decreases in vessel diameter persisted in group II<sub>B</sub> (hypocapnic) animals ( $60 \pm 11$  compared with  $72 \pm 7 \mu\text{m}$  at control) and reappeared in group II<sub>A</sub> (normocapnic) animals ( $53 \pm 4$  compared with  $59 \pm 4 \mu\text{m}$  at control).

#### Dexmedetomidine, End-tidal Gas, and Arterial Gas Tensions

Table 5 summarizes the effects of dexmedetomidine on end-tidal carbon dioxide concentrations and concurrent systemic arterial pH, carbon dioxide, and oxygen concentrations. As in groups I<sub>B</sub> and II<sub>B</sub>, dexmedetomidine reduced end-tidal carbon dioxide concentrations ( $36 \pm 0$  to  $31 \pm 1$  mmHg; control compared with 30 min after dexmedetomidine;  $P < 0.05$ ) with a concurrent decrease in the arterial partial pressure of carbon dioxide ( $36 \pm 0$  to  $30 \pm 2$  mmHg; control compared with 30 min after dexmedetomidine;  $P < 0.05$ ) without significantly altering pH or arterial oxygen partial pressures.

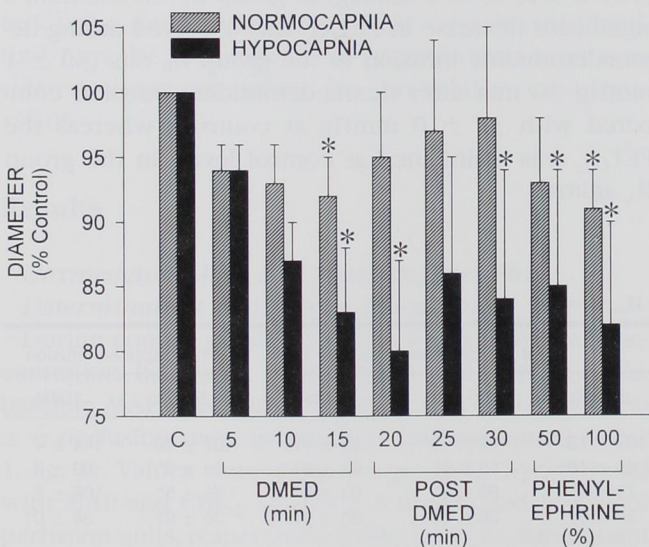

**Fig. 2.** The effect of dexmedetomidine ( $20 \mu\text{g}/\text{kg}$ ) on pial arterial diameter during normocapnia and hypocapnia and after restoration of systemic arterial pressure with phenylephrine. % refers to 50% or 100% restoration of control mean arterial pressure. \*Significantly different ( $P < 0.05$ ) compared with control values.

## Discussion

This study examined the specific effects of dexmedetomidine on regional CBF in the rat cerebral cortex using laser-Doppler flowmetry and the effects on pial arterial diameter. In the present investigation, dexmedetomidine produced significant decreases in CBF<sub>ldf</sub> and in pial vessel diameter. The slow intravenous infusion of dexmedetomidine that we used in these experiments

## DEXMETETOMIDINE AND CEREBROVASCULAR CIRCULATION

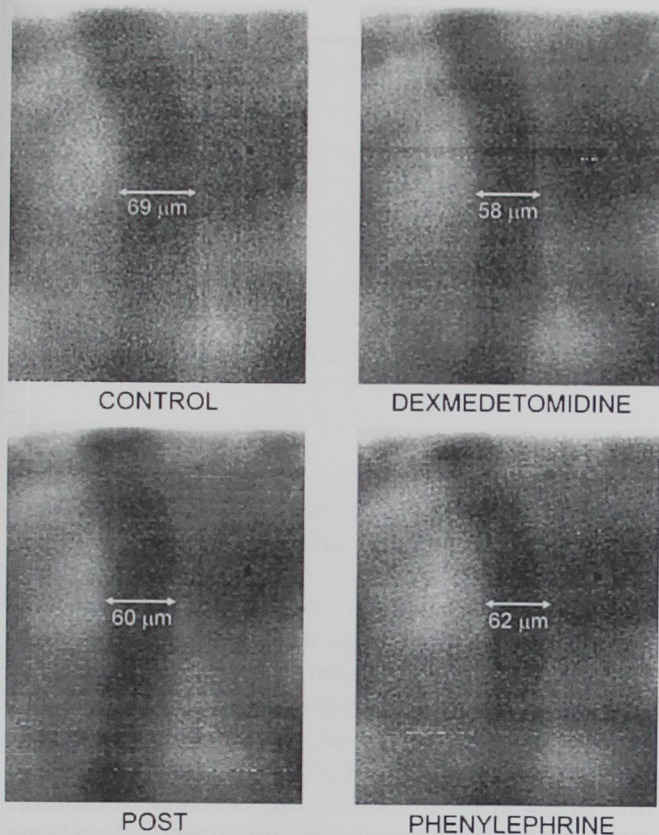

Fig. 3. The effect of dexmedetomidine on pial arteriolar diameter during control, immediately after dexmedetomidine (20  $\mu\text{g}/\text{kg}$ ) infusion, 30 min after infusion (post), and after restoration of systemic arterial pressure (phenylephrine). The measured diameter of the vessel is labeled in white. Note the decrease in diameter after dexmedetomidine infusion.

transiently increased then progressively and significantly reduced SAP, which is characteristic of  $\alpha_2$ -adrenergic agonists. Restoration of SAP by phenylephrine returned  $\text{CBF}_{\text{ldf}}$  to near control values in normocapnic rats but not in hypocapnic rats. In contrast, after restoration of MAP to control values, pial vessel diameter remained significantly decreased in both normocapnic and hypocapnic animals.

The  $\alpha_2$ -adrenergic agonists, including clonidine and dexmedetomidine, produce multiple actions within the central nervous system and reduce the dose requirements for anesthetics and narcotics.<sup>1-6,24</sup> Initially a transient increase in SAP occurs due to peripheral vascular  $\alpha_2$ -adrenoceptor-mediated vasoconstriction.<sup>25,26</sup> These

agents alter systemic hemodynamics through a central sympatholytic and parasympathomimetic action *via* specific  $\alpha_2$ -adrenergic receptors at bulbar vasomotor centers, with contributions from supracollicular centers.<sup>7,27,28</sup> This central nervous system action decreases arterial pressure which, in the present investigation, was reversed with phenylephrine, which has no intrinsic effects on CBF.<sup>29</sup>

$\alpha_2$ -Adrenergic receptors are widely distributed within the cerebral vasculature,<sup>30</sup> and specific cerebral vasoconstrictive responses produced by activation of these receptors has been proposed.<sup>31</sup> Clonidine may significantly reduce CBF in both humans and animals<sup>9-12</sup> by stimulating postsynaptic vascular  $\alpha_2$ -adrenergic receptors. Previous studies have suggested that dexmedetomidine may also reduce CBF, in both isoflurane- and halothane-anesthetized dogs, without specifically influencing the metabolic rate for oxygen.<sup>11-13</sup> This suggests that dexmedetomidine acts on specific brain regions with dense populations of  $\alpha_2$ -receptors to directly vasoconstrict rather than indirectly vasoconstrict secondary to cerebral metabolic depressant effects. However, *in vitro* studies have shown an  $\alpha_2$ -adrenergic receptor-mediated vasodilatation of rat middle cerebral arteries that involved<sup>32</sup> nitric oxide and a pertussis toxin-sensitive G protein as mediators. Thus vascular actions, altered sympathetic nerve or regional cerebral activity, and vessel specific actions all may influence the responses seen to  $\alpha_2$ -adrenergic agonists.

The commonly used cerebral venous outflow technique to measure CBF requires extensive surgical preparation with possible cerebrovascular compromise.<sup>11,12</sup> Laser-Doppler flow determination of CBF is a sensitive and reliable method to measure regional CBF with a fast response time. To place the  $\text{CBF}_{\text{ldf}}$  probe, most studies use a cranial window technique.<sup>17,20</sup> However, the present studies used a minimally invasive model to monitor perfusion in the rat brain cortex without requiring craniotomy.<sup>18</sup> The  $\text{CBF}_{\text{ldf}}$  probe was applied over a small area of thinned cranium, without invading the tissues to be analyzed. The remaining cranium constitutes an effective barrier for gas diffusion, helps isolate the cerebral tissues from the atmosphere, minimizes or eliminates cerebral hyperemia, maintains local cerebral temperature, and preserves the intracranial pressure.

It has been suggested that CBF is maintained at nearly constant values despite wide variations in

**Table 5. Effects of Dexmedetomidine on Arterial Blood Gas Tensions (Group III, N = 7)**

|                                      | Control     | Dexmedetomidine Infusion<br>(15 min) | Post Dexmedetomidine<br>(30 min) | Phenylephrine Infusion<br>(100%) |
|--------------------------------------|-------------|--------------------------------------|----------------------------------|----------------------------------|
| SAP (mmHg)                           | 126 ± 4     | 101 ± 8*                             | 84 ± 5*                          | 121 ± 5                          |
| DAP (mmHg)                           | 82 ± 3      | 71 ± 6*                              | 57 ± 3*                          | 75 ± 4                           |
| MAP (mmHg)                           | 97 ± 4      | 81 ± 7*                              | 66 ± 4*                          | 90 ± 4                           |
| FET <sub>CO<sub>2</sub></sub> (mmHg) | 36 ± 0      | 33 ± 1*                              | 31 ± 1*                          | 35 ± 2                           |
| pH                                   | 7.41 ± 0.02 | 7.45 ± 0.06                          | 7.43 ± 0.02                      | 7.38 ± 0.04                      |
| p <sub>CO<sub>2</sub></sub> (mmHg)   | 36 ± 1      | 32 ± 1                               | 30 ± 2*                          | 33 ± 3                           |
| p <sub>O<sub>2</sub></sub> (mmHg)    | 122 ± 6     | 120 ± 10                             | 124 ± 11                         | 116 ± 9                          |

SAP = systolic arterial pressure; DAP = diastolic arterial pressure; MAP = mean arterial pressure; HR = heart rate; FET<sub>CO<sub>2</sub></sub> = end-tidal carbon dioxide concentrations; p<sub>CO<sub>2</sub></sub> = arterial partial pressure of carbon dioxide; p<sub>O<sub>2</sub></sub> = arterial partial pressure of oxygen.

\* Significantly different ( $P < 0.05$ ) from control.

MAP by adjustments in cerebral vascular resistance.<sup>33</sup> Autoregulation of CBF<sub>ldf</sub> has been observed between MAPs of 60–140 mmHg.<sup>19</sup> A linear relation between CBF<sub>ldf</sub> and FET<sub>CO<sub>2</sub></sub> levels has also been demonstrated.<sup>17,18</sup> Previous studies with volatile anesthetics, including halothane, have demonstrated dose-related increases in CBF<sub>ldf</sub> in rats.<sup>34</sup> While autoregulation of CBF<sub>ldf</sub> persisted, it was attenuated at low concentrations of halothane. Therefore, the use of halothane as the baseline anesthetic, and of pentobarbital as the initial anesthetic, may represent a potential limitation of the present investigation and may have affected the results obtained after dexmedetomidine administration, possibly by attenuating vascular responsiveness.

The finding that dexmedetomidine produced significant decreases in CBF<sub>ldf</sub> despite an initial transient increase in MAP is consistent with previous studies in which a decrease in CBF was observed with dexmedetomidine with either no change or an increase in associated MAP.<sup>11,12</sup> This suggests that dexmedetomidine may have a direct action on the cerebral vessels to reduce the CBF. The alterations in the CBF<sub>ldf</sub> seen with decreases and increases in MAP, in the autoregulatory range of 60–140 mmHg, suggest that dexmedetomidine might disrupt the autoregulatory mechanisms of the cerebral circulation. As expected, the decrease in CBF<sub>ldf</sub> was more pronounced in the presence of hypocapnia. The cause of the hypocapnic response produced by dexmedetomidine, in animals in which ventilation was not adjusted, may represent an increase in the depth of anesthesia in these animals already anesthetized with only 1 mean alveolar concentration of halo-

thane.<sup>1–3</sup> Previous studies have shown a species-specific decrease in FET<sub>CO<sub>2</sub></sub> after administration of dexmedetomidine.<sup>4,25,35</sup>

Various methods have been used in the past to study diameter changes in cerebral microcirculation. Simultaneous measurements of pial diameter and CBF<sub>ldf</sub> have also been performed.<sup>17,20</sup> Most previous studies describe the closed cranial window preparation for visualizing the cerebral cortex.<sup>21</sup> Although this preparation preserves the cerebral microenvironment, the pial vessels may be injured when bone and dura are lifted. To obviate this, we measured microvessel diameter without breaking the integrity of the cranium. Similar to the measurement of CBF<sub>ldf</sub>, the pial diameters were also measured through the thinned cranial bone of rats with a fairly minimal surgical procedure. To our knowledge, this is the first time cerebrovascular behavior has been studied by direct microscopy through the thinned intact cranial bone of adult rats.

Potential limitations of the current technique include a possible erroneous simultaneous measurement of cortical, dural, and cranial bone flow rather than purely cortical microvascular flow and assessment of a single flow point rather than flow distribution under the cranial hollow. Extreme care was taken in each experiment to visualize cranial bone blood vessels during the microdissection of the cranial hollow. Vessels were encountered during drilling but not near the bottom when pial vessels were clearly visible. The bone vessels and pial vessels have well-distinguishable structures and, therefore, cannot be mistaken. In addition, the density of dural vessels and their blood flow is low. Furthermore, the



## DEXMETOMIDINE AND CEREBROVASCULAR CIRCULATION

photon migration path distribution in brain tissue is banana shaped between the laser emitting and receiving fibers and, therefore, the measurement should be more sensitive to subsurface vessels. Only a single point measurement of cortical flow was obtained, and because the probe was always positioned at the site with the lowest reading, a higher flow would have been present at the other sites beneath the cranial hollow, although we did not do a systematic search in this investigation. An additional limitation of the present technique is the difficulty in performing topical pharmacologic studies, through a burr hole with an intact cranium in contrast to open preparations.

Studies evaluating the responsiveness of the cerebral vasculature to adrenergic-related agents have produced conflicting results. Norepinephrine has been shown to constrict pial vessels by stimulating  $\alpha_2$ -adrenoceptors in pigs,<sup>36</sup> but it also may differentially affect the cerebral arteries, with constriction in rostral regions and dilatation in caudal regions of the bovine brain, resulting in an altered blood flow distribution.<sup>37</sup> Norepinephrine has also been shown to have no effect on cerebral arterioles under baseline conditions.<sup>38</sup>

Clonidine may exert cerebrovascular constrictive effects *in vivo*<sup>39</sup> and *in vitro*,<sup>37</sup> probably mediated by its actions on cerebral arterial  $\alpha_2$ -receptors. However, clonidine also may inhibit neurosympathetic cerebroarterial constriction by activating prejunctional  $\alpha_2$ -adrenoceptors.<sup>40</sup> A direct cerebral vasoconstrictor action has been proposed for dexmedetomidine due to its ability to decrease CBF.<sup>11-13</sup> Coughlan *et al.*<sup>22</sup> showed dexmedetomidine-induced direct vasoconstriction of canine middle cerebral arteries *in vitro*. Recently, Ishiyama *et al.*<sup>23</sup> showed that topical application of dexmedetomidine constricted pial arteries and veins. Although the vasoconstrictive effects of dexmedetomidine appear to be mediated by activating  $\alpha_2$ -adrenoceptors, opposing vasodilatory effects may also occur when adenosine triphosphate-sensitive  $K^+$  channels are reactivated.<sup>23</sup> Similar to its effect on the CBF, the cerebrovascular constrictive effects of dexmedetomidine do not appear to be metabolically mediated. It is also probably not influenced by nitric oxide release because the nitric oxide synthase inhibitor L-NAME did not attenuate dexmedetomidine-induced constriction of cerebral arteries.<sup>22,23</sup>

In the present study, we found that the infusion of dexmedetomidine initially caused cerebral vasoconstriction despite reductions in MAP. This suggests that dexmedetomidine directly vasoconstricts the pial vessels, similar to the observed *in vitro* effects.<sup>22</sup> Presumably, dexmedetomidine might affect the autoregulation of pial arterioles. Although the initial vasoconstriction after dexmedetomidine infusion was followed by vasodilatation as the MAP decreased further, the vessel diameters did not return to control values during either normocapnia or hypocapnia. Restoration of MAP then restored  $CBF_{ldf}$  to control levels during controlled normocapnia, but not during hypocapnia, after dexmedetomidine.

These results are consistent with a direct vasoconstrictor effect of dexmedetomidine overriding the cerebrovascular pressure autoregulation. The differences in the response patterns between  $CBF_{ldf}$  and pial vessel responses to restoration of MAP may reflect the difference in measurement techniques or the specific vascular segments whose responses are assessed. Changes in CBF are believed to be accompanied by adjustments in the cerebral arteriolar diameter. Haberi *et al.*<sup>17</sup> found a linear relation between  $CBF_{ldf}$  responses and arteriolar diameter responses to vasoconstrictor and vasodilator stimuli but suggest that diameter measurements, which are highly localized, may not precisely reflect events in other parts of the arterial tree. On the other hand, Ngai *et al.*<sup>20</sup> found that pial arteriolar diameter changes parallel  $CBF_{ldf}$  responses during sciatic nerve stimulation and suggest that arteriolar diameter changes can be considered valid indicators of local cerebral perfusion responses. However, it is still unclear whether surface vessel diameter changes may quantitatively predict flow responses in the cerebral cortex. Although flow within an arteriole has been linked proportionally to its internal diameter,<sup>41</sup> the distribution of cerebrovascular resistance may not be in a steady state in the vascular network. The region studied and the magnitude and direction of response of parenchymal vessels monitored by  $CBF_{ldf}$  may be different than that of pial arterioles.

In conclusion, this investigation shows the ability of dexmedetomidine to significantly affect the cerebrovascular system. During spontaneous hypocapnia and controlled normocapnia, dexmedetomidine decreased SAP,  $CBF_{ldf}$ , and pial arteriolar diame-

ter. Restoration of SAP did not reverse the dexmedetomidine-induced decrease in pial arteriolar diameter, but  $CBF_{idf}$  measurements of CBF did return to control levels during normocapnia but not during hypocapnia. Further investigations are needed to fully delineate the differential actions of dexmedetomidine on various vascular segments of the cerebral circulation.

The authors thank Ines Krolo for performing supplementary experiments, David Schwabe for providing technical assistance, and Angela M. Barnes for preparing the manuscript.

## References

1. Segal IS, Vickery RG, Walton JK, Doze VA, Maze M: Dexmedetomidine diminishes halothane anesthetic requirement in rats through a postsynaptic  $\alpha_2$  adrenergic receptor. *ANESTHESIOLOGY* 1988; 69:818-23
2. Jaakola ML, Salonen M, Lehtinen R, Scheinin H: The analgesic actions of dexmedetomidine—a novel alpha-2 adrenoceptor agonist—in healthy volunteers. *Pain* 1991; 46:281-5
3. Doze VA, Chen BX, Maze M: Dexmedetomidine produces a hypnotic-anesthetic action in rats *via* activation of central  $\alpha_2$  adrenoceptors. *ANESTHESIOLOGY* 1989; 71:75-9
4. Zornow MH: Ventilatory, hemodynamic and sedative effects of the alpha 2 adrenergic agonist, dexmedetomidine. *Neuropharmacology* 1991; 30:1065-71
5. Proctor LT, Schmeling WT, Warltier DC: Premedication with oral dexmedetomidine alters hemodynamic actions of intravenous anesthetic agents in chronically instrumented dogs. *ANESTHESIOLOGY* 1992; 77:554-62
6. Bloor BC, Schmeling WT: Cardiovascular effects of  $\alpha_2$ -adrenoceptors. *Anaesth Pharmacol Rev* 1993; 1:246-62
7. Unnerstall JR, Kopajtic TA, Kuhar MJ: Distribution of alpha-2 agonist binding sites in the rat and human central nervous system: analysis of some functional, anatomic correlates of the pharmacologic effects of clonidine and related adrenergic agents. *Brain Res Rev* 1984; 7:69-101
8. James IM, Larbi E, Zaimis E: The effect of the acute intravenous administration of clonidine on cerebral blood flow in man. *Br J Pharmacol* 1970; 39:198P-9P
9. Greene CS, Cretler DD, Cervenka K, McCoy CE, Brown FD, Murphy MB: Cerebral blood flow during the acute therapy of severe hypertension with oral clonidine. *Am J Emerg Med* 1990; 8:293-6
10. Kanawati IS, Yaksh TL, Anderson RE, Marsh RW: Effects of clonidine on cerebral blood flow and the response to arterial  $CO_2$ . *J Cereb Blood Flow Metab* 1986; 6:358-65
11. Karlsson BR, Forsman M, Roald OK, Heier MS, Steen PA: Effect of dexmedetomidine, a selective and potent alpha-2 agonist, on cerebral blood flow and oxygen consumption during halothane anesthesia in dogs. *Anesth Analg* 1990; 71:125-9
12. Zornow MH, Fleischer JE, Scheller MS, Nakakinmura K, Drummond JC: Dexmedetomidine, and alpha-2-adrenergic agonist, decreases cerebral blood flow in the isoflurane-anesthetized dog. *Anesth Analg* 1990; 70:623-30
13. McPherson RW, Kirsch JR, Traystman RJ: Inhibition of nitric oxide synthetase does not affect alpha 2-adrenergic-mediated cerebral vasoconstriction. *Anesth Analg* 1994; 78:67-72
14. McPherson RW, Koehler RC, Traystman RJ: Hypoxia, alpha-2-adrenergic, and nitric oxide-dependent interactions on canine cerebral blood flow. *Am J Physiol* 1994; 226:H476-H82
15. Fale A, Kirsch JR, McPherson RW:  $\alpha_2$ -adrenergic agonist effects on normocapnic and hypercapnic cerebral blood flow in the dog are anesthetic dependent. *Anesth Analg* 1994; 79:892-8
16. Hansen TD, Warner DS, Todd MM: Distribution of cerebral blood flow during halothane versus isoflurane anesthesia in rats. *ANESTHESIOLOGY* 1988; 69:332-7
17. Haberl RL, Heizer ML, Marmarou A, Ellis EF: Laser-Doppler assessment of brain microcirculation: Effect of systemic alterations. *Am J Physiol* 1989; 256:H1247-H54
18. Hudetz AG, Roman RJ, Harder DR: Spontaneous flow oscillations in the cerebral cortex during acute changes in mean arterial pressure. *J Cereb Blood Flow Metab* 1992; 12:491-9
19. Florence G, Seylaz J: Rapid autoregulation of cerebral blood flow: A laser-doppler flowmetry study. *J Cereb Blood Flow Metab* 1992; 12:674-80
20. Ngai AC, Meno JR, Winn HR: Simultaneous measurements of pial arteriolar diameter and laser-doppler flow during somatosensory stimulation. *J Cereb Blood Flow Metabol* 1995; 15:124-7
21. Morii S, Ngai AC, Winn HR: Reactivity of rat pial arterioles and venules to adenosine and carbon dioxide: With detailed description of the closed cranial window technique in rats. *J Cereb Blood Flow Metab* 1986; 6:34-41
22. Coughlan MG, Lee JG, Bosnjak ZJ, Schmeling WT, Kampine JP, Warltier DC: Direct coronary and cerebral vascular responses to dexmedetomidine. *ANESTHESIOLOGY* 1992; 77:998-1006
23. Ishiyama T, Dohi S, Iida H, Watanabe Y, Shimonaka H: Mechanisms of dexmedetomidine-induced cerebrovascular effects in canine *in vivo* experiments. *Anesth Analg* 1995; 81:1208-15
24. Flacke JW, Bloor BC, Flacke WE, Wong D, Dazza S, Stead SW, Laus H: Reduced narcotic requirement by clonidine with improved hemodynamic and adrenergic stability in patients undergoing coronary bypass surgery. *ANESTHESIOLOGY* 1987; 67:11-9
25. Schmeling WT, Kampine JP, Roerig DL, Warltier DC: The effects of the stereoisomers of the  $\alpha_2$ -adrenergic agonist medetomidine on systemic and coronary hemodynamics in conscious dogs. *ANESTHESIOLOGY* 1991; 75:499-511
26. Smet G, Hoobler SW, Sanbar S, Julius S: Clinical observations on a new antihypertensive drug, 2-(2,6-dichlorophenylamine-2-imidazoline hydrochloride). *Am Heart J* 1969; 77:473-8
27. Schmitt H, Schmitt H: Localization of the hypotensive effect of 2-(2,6-dichlorophenylamino)-2-imidazoline hydrochloride (St-155, Catapresan). *Eur J Pharmacol* 1969; 6:8-12
28. Tadepalli AS, Mills E: Contribution of supracollicular structures of the brain to the cerebral depression of cardiovascular function by clonidine. *J Pharmacol Exp Ther* 1978; 205:693-701
29. Edvinsson L, Lacombe P, Owman CH, Reynier-Rebuffel AM, Seylaz J: Quantitative changes in regional cerebral blood flow of rats induced by alpha- and beta adrenergic stimulants. *Acta Physiol Scand* 1979; 107:289-96
30. Skarby T: Pharmacological properties of prejunctional alpha-adrenoceptors in isolated feline middle cerebral arteries: comparison

## DEXMEDETOMIDINE AND CEREBROVASCULAR CIRCULATION

with the postjunctional alpha-adrenoceptors. *Acta Physiol Scand* 1984; 122:165-74

31. Edvinsson L, Mackenzie ET, Robert JP, Skarby T, Young AR: Cerebrovascular responses to haemorrhagic hypotension in anaesthetized cats: Effects of alpha-adrenoceptor antagonists. *Acta Physiol Scand* 1985; 123:317-23

32. Bryan RM, Eichler MY, Swafford MWG, Johnson TD, Suresh MS, Childres WF: Stimulation of  $\alpha_2$ -adrenoceptors dilates the rat middle cerebral artery. *ANESTHESIOLOGY* 1996; 85:82-90

33. Hernandez MJ, Brennan RW, Bowman GS: Cerebral blood flow autoregulation in the rat. *Stroke* 1978; 9:150-5

34. Lee JG, Hudetz AG, Smith JJ, Hillard CJ, Bosnjak ZJ, Kampine JP: The effects of halothane and isoflurane on cerebrocortical microcirculation and autoregulation as assessed by laser doppler flowmetry. *Anesth Analg* 1994; 79:58-65

35. Ward DS: Respiratory effects of  $\alpha_2$ -adrenoceptor agonists. *Anaesth Pharmacol Rev* 1993; 1:263-7

36. Busija DW, Leffler CW: Exogenous norepinephrine constricts cerebral arterioles *via*  $\alpha_2$ -adrenoceptors in newborn pigs. *J Cereb Blood Metab* 1987; 7:184-8

37. Ayajiki K, Toda N: Isolated bovine cerebral arteries from rostral and caudal regions: Distinct responses to adrenoceptor agonists. *Eur J Pharmacol* 1990; 191:417-25

38. Bauknight Jr. GC, Faraci FM, Heistad DD: Endothelium-derived relaxing factor modulates noradrenergic constriction of cerebral arterioles in rabbits. *Stroke* 1992; 23:1522-5

39. Busija DW, Leffler CW: Post junctional alpha 2-adrenergic receptors in pial arteries of anesthetized newborn pigs. *Dev Pharmacol Ther* 1987; 10:36-46

40. Reichl R, Walland A: Inhibition of neurosympathetic cerebroarterial constriction by clonidine in cats. *Eur J Pharmacol* 1980; 68:349-57

41. Mayrovitz HN, Roy J: Microvascular blood flow: Evidence indicating a cubic dependence on arteriolar diameter. *Am J Physiol* 1983; 243:H1031-H8
